# Supplementary material for: Gamete expression of TALE class HD genes activates the diploid sporophyte program in Marchantia polymorpha
Source: eLife journal article supplement (doi:10.7554/elife.57088), 2021-09-17
Supplement: fig1-data1 [file elife-57088-fig1-data1-v3.pdf]

**Figure 1—source data 1. Molecular lesions of alleles listed in Figure 1 and Table 1.**

**Single knock-out lines**

wt MpKNOX1 5' - GACACCCTTCAGAACACAGCTGATGGTAAACAGGATGTGACCCT NNNN AAGCAGAGCGAAAGTGTCCGTCAGTGGTGGCCAAAGTGAG - - 3'  
 Mpknox1-6 5' - CAGACTTGGAGACACCCTTCAGAACACAGCTGATGGTA- - - - - TGGTGGCCAAAGTGAG - - 3' -2359 bp female

wt MpBELL2 5' - CAATGGATTATGAAGCTCGTCACTCAC AAGAGGTGCTTTCGCCTGTCCA - - 3'  
 Mpbell2-1 5' - CAATGGATTATGAAGCTCGTCACTCAC AAGAGGTGCTTTCGCCTGTCCA - - 3' +1 bp female  
 Mpbell2-2 5' - CAATGGATTATGAAGCTCGTCACT - - - - GCTTTCGCCTGTCCA - - 3' -10 bp male  
 Mpbell2-11 5' - CAATGGATTATGAAGCTCGTCACTCA- AAGAGGTGCTTTCGCCTGTCCA - - 3' -1 bp male

wt MpBELL3 5' - TATCCTAAAGGAGACGAGTGGGGGCCACTTGTGGCTTCCACAGG NNNN ACAACGAGCGCCCATTCCTCCAGGCTGAACAGTACGGGGTCCACC - - 3'  
 Mpbell3-4 5' - TATCCTAAAGGAGACGAGTGGGGGCCAC - - - - - AGTACGGGGTCCACC - - 3' -2217 bp male  
 Mpbell3-10 5' - TATCCTAAAGGAGACGAGTGGGGGCCAC - - - - - GTACGGGGTCCACC - - 3' -2218 bp male

wt MpBELL4 5' - AGAACGAATTGCACCCGACAGCCTCCTTGGGTTCAAGGAGTTGGAAGT NNNN TTTCTCGTAATCGGAGGAACAACAATGGGAATCGTAATA - - 3'  
 Mpbell4-5 5' - AGAACGAATTGCACCCAGCACA - - - - - AATGGGAATCGTAATA - - 3' -1135 bp male  
 Mpbell4-24 5' - AGAACGAATTGCACCCAGCACA - - - - - AATGGGAATCGTAATA - - 3' -1135 bp male

**Multiple gene knock-out lines**

**Mpbell34-4 (Mpbell13-1 Mpbell14-1) male**

wt MpBELL3 5' - TATCCTAAAGGAGACGAGTGGGGGCCA CTTGTGGCTTCCACAGGAATGCAAAACAA - - 3'  
 Mpbell3-1 5' - TATCCTAAAGGAGACGAGTGGGGGCCA tctcct-TTGTGGCTTCCACAGGAATGCAAAACAA - - 3' +6 bp/-1 bp

wt MpBELL3 5' - TGACAACGAGCGCCCATTCCTCCAGGCTGAACA GTACGGGGTCCACC - - 3'  
 Mpbell3-1 5' - TGACAACGAGCGCCCATTCCTCCAGGCTGAACAaGTACGGGGTCCACC - - 3' +1 bp

wt MpBELL4 5' - AGAACGAATTGCACCCGACAGCCTCCTTGGGTTCAAGGAGTTGGAAGT - - 3'  
 Mpbell4-1 5' - AGAACGAATTGCACCCAGCACA-AGCCTCCTTGGGTTCAAGGAGTTGGAAGT - - 3' -1 bp

**Mpbell234-15 (Mpbell12-15 Mpbell13-15 Mpbell14-15) male**

wt MpBELL2 5' - CAATGGATTATGAAGCTCGTCA CTCACAAGAGGTGCTTTCGCCTGTCCA - - 3'  
 Mpbell2-15 5' - CAATGGATTATGAAGCTCGTCAagagcaagcactctttgtctgc - - - - -GTGCTTTCGCCTGTCCA - - 3' +23 bp/-10 bp

wt MpBELL3 5' - TATCCTAAAGGAGACGAGTGGGGGCCA gRNA1 CTTGTGGCTTCCACAGGAATGCAAAACAA - - 3'  
 Mpbell3-15 5' - TATCCTAAAGGAGACGAGTGGGGGCCAaacaatgagtaagtgttcaaatcctgattgttttggagtggagacga-TTGTGGCTTCCACAGGAATGCAAAACAA - - 3' +49bp/-1bp

wt MpBELL3 5' - TGACAACGAGCGCCCATTCCTCCAGGCTGAACA GTACGGGGTCCACC - - 3'  
 Mpbell3-15 5' - TGACAACGAGCGCCCATTCCTCCAGGCTGAACAaGTACGGGGTCCACC - - 3' +1 bp

wt MpBELL4 5' - AGAACGAATTGCACCCGACAGCCTCCTTGGGTTCAAGGAGTTGGAAGT - - 3'  
 Mpbell4-15 5' - AGAACGAATTGCACCCAGCACA-AGCCTCCTTGGGTTCAAGGAGTTGGAAGT - - 3' -1 bp

**Mpbell234-83 (Mpbell12-83 Mpbell13-83 Mpbell14-83) male**

wt MpBELL2 5' - AACTTCTCGTGAAGATGTATTT NN GGATTATGAAGCTCGTCACTCACaAGAGGTGCTTTC NN GCAAAAGGAAGATTAGCAAAAGGAATCTGGAGTTACCTATGT - - 3'  
 Mpbell2-83 5' - AACTTCTCGTGAAGATGTATTT- - - - - ggaggc-110bp-atatac- - - - -ATCTGGAGTTACCTATGT - - 3' +110 bp/-1401 bp

wt MpBELL3 5' - TATCCTAAAGGAGACGAGTGGGGGCCACTTGTGGCTTCCACAGG NNNN ACAACGAGCGCCCATTCCTCCAGGCTGAACAGTACGGGGTCCACC - - 3'  
 Mpbell3-83 5' - TATCCTAAAGGAGACGAGTGGGGGCCAC - - - - - AGTACGGGGTCCACC - - 3' -2217 bp

wt MpBELL4 5' - AGAACGAATTGCACCCGACAGCCTCCTTGGGTTCAAGGAGTTGGAAGT NNNN TTTCTCGTAATCGGAGGAACAACAATGGGAATCGTAATA - - 3'  
 Mpbell4-83 5' - AGAACGAATTGCACCCAGCACA - - - - - attgcac - - - - - AATGGGAATCGTAATA - - 3' +7 bp/-1135 bp

**Mpbell234-7 (Mpbell12-7 Mpbell13-7 Mpbell14-7) female**

wt MpBELL2 5' - CAATGGATTATGAAGCTCGTCACTCAC gRNA1 AAGAGGTGCTTTCGCCTGTCCA - - 3'  
 Mpbell2-7 5' - CAATGGATTATGAAGCTCGTCACTCAC - - gacggtgaaagcactt - - - - - CTTTCGCCTGTCCA - - 3' +16 bp/-8 bp

wt MpBELL3 5' - TATCCTAAAGGAGACGAGTGGGGGCCACTTGTGGCTTCCACAGGAATGCAAAACAATCA NNNN CGAGCGCCCATTCCTCCAGGCTGAACAGTACGGGGTCCACC - - 3'  
 Mpbell3-7 5' - TATCCTAAAGGAGACGAGTGGG - - - - - t - - - - -ACAATCA NNNN CGAGCGCCCATTCCTCCAGGCTGAACAGTACGGGGTCCACC - - 3' +1 bp/-30bp ; wt

wt MpBELL4 5' - AGAACGAATTGCACCCAGCACA gRNA1 CAGCCTCCTTGGGTTCAAGGAGTTGGAAGT - - 3'  
 Mpbell4-7 5' - AGAACGAATTGCACCCAGCACAgaattcgttatacacataaaaaaattatgtttcgaatacagcctccttgggttcaggaagttggaact - - 3' +44 bp

**Mpbell234-18 (Mpbell12-18 Mpbell13-18 Mpbell14-18) female**

**wt MpBELL2** 5' - CAATGGATTATGAAGCTCGT gRNA1 CACTCACAAGAGGTGCTTTCGCCTGTCCA - - 3'  
**Mpbell12-18** 5' - CAATGGATTATGAAGCTCGT - - gagtgcgaggtg - - - AAGAGGTGCTTTCGCCTGTCCA - - 3' +13 bp/-6 bp

**wt MpBELL3** 5' - TATCCTAAAGGAGACGAGTGGGGCCACTTgRNA1 PAM TGGCTTCCACAGGAATGC NN GTAATCGAAT NN CGAGCGCCCAgRNA2 PAM TCCCCCAGGCTGAACA GTACGGGGCACC - - 3'  
**Mpbell13-18** 5' - TATCCTAAAGGAGACGAGTGGG- - - atccaa-97bp-cgatcc - - TAAATCGAAT NN CGAGCGCCCAgRNA2 PAM TCCCCCAGGCTGAACA GTACGGGGCACC - - 3' +97 bp/-304; +1 bp

**wt MpBELL4** 5' - AGAACGAATTGCACPAM gRNA1 CGACAGCCTCCTGGGTTCCAGGAAGTTGGA ACT - - 3'  
**Mpbell14-18** 5' - AGAACGAATTGCACCGA-AGCCTCCTGGGTTCCAGGAAGTTGGA ACT - - 3' -1 bp
