# Supplementary material for: Gamete expression of TALE class HD genes activates the diploid sporophyte program in Marchantia polymorpha
Source: eLife. 2021 Sep 17;10:e57088. doi: 10.7554/eLife.57088 (PMC8476127; doi:10.7554/eLife.57088)
Supplement: Figure 3—figure supplement 1—source data 1. [file elife-57088-fig3-figsupp1-data1.xlsx]

## Sheet: knox1-6 x wt male
Figure 3—figure supplement 1—source data 1. Developmental staging data of crosses between Mpknox1-6 females and wild-type males
slide ID and week past fertilization	aborted	1wk	2wk	3wk	4wk
2wpf
04.06.21
1/1		1
1/2
1/3
2wpf
05.18
I a	4
Ib	3
IIa	1
IIb	2
IIc	5
1wpf
18.11.20
1/1	3
1/2	8
1/3	6
1/4	7
2wpf
11.11.20
1/1	1
1/2
1/3
1wpf
11.11.20
1/1	5
1/2	4
2/1	4
2/2	2
2wpf
29.09.20
1/1
1/2	2
1/3	1	1
2/1	5
2/2	2	1
2/3	10
1wpf
23.04.18
I	10
II	3
III	8
1wpf
5/18
I	5
II	3
III	1					max stage =	Sum of all sporopytes that reached the max stage for each slide
IV	9					below max stage/arrested =	total fertilization events - max stage - aborted at zygote stage
V	7
VI	5					total fertilization events/n	max stage	below max stage/arrested	aborted at zygote stage
	126	3				129	0	3	126
							max stage	below max stage/arrested	aborted at zygote stage
						knox1-6 x wt male	0	2.32558	97.6744
