# Supplementary material for: Gamete expression of TALE class HD genes activates the diploid sporophyte program in Marchantia polymorpha
Source: eLife. 2021 Sep 17;10:e57088. doi: 10.7554/eLife.57088 (PMC8476127; doi:10.7554/eLife.57088)
Supplement: Figure 5—source data 1. — (a) Developmental staging data of crosses between wild-type females and wild-type males. (b) Developmental staging data of crosses between wild-type females and Mpbell234-83 males. (c) Developmental staging data of crosses between Mpbell234-18 females and wild-type males. (d) Developmental staging data of crosses between Mpbell234-18 females and Mpbell234-83 males. (e) Summary and calculations of developmental staging data. [file elife-57088-fig5-data1.xlsx]

## Sheet: wild type x wild type
Figure 5—source data 1a. Developmental staging data of crosses between wild-type females and wild-type males
slide ID and week past fertilization	aborted	1wk	2wk	3wk	4wk
3wpf
21.04.20
1/1	1			1
1/2				1
1/3		1		1
1/4				1
1/5		1
2wpf
14.04.20
1/1		1	3
1/2	1	3	2
1/3	1	2	3
2wpf
14.04.20
2/1		2	8
2/2		1	2
2/3		2	3
2/4		2	4
2/5		4	1
2/6		1
2wpf
12.02.19
1		2	1
2			3
3			1
4		1	5
3wpf
28.02.19
1/8 1				3
1/8 2		1
1/9	none
4wpf
12.10.19
4/1		4			2
9/1		1			3	max stage =	Sum of all sporopytes that reached the max stage for each slide
2wpf						below max stage/arrested =	total fertilization events - max stage - aborted at zygote stage
12.10.19
2/1			4
4/1	1	2	5			total fertilization events/n	max stage	below max stage/arrested	aborted at zygote stage
Sum	4	31	45	7	5	92	57	31	4

## Sheet: wild type x Mpbell234
Figure 5b—source data 1b. Developmental staging data of crosses between wild-type females and Mpbell234-83 males
slide ID and week past fertilization	aborted	1wk	2wk	3wk	4wk
3wpf
22.04.20
2/1	1	1
2/2			1
2/3	none
2/4	none
2wpf
14.04.20
1/1	3	2	1
1/2		1	1
1/3	none
3wpf
22.04.20
1/1		1		1
1/2	1	1	1
1/3	1	2	1
1/4			2
1/5	1	1
1/6	1		1	1
2wpf
14.04.20
2/1		1	2
2/2		1
2/3			1
2/4			1
2/5			1
2wpf
13.08.19
1/1	none
2wpf
08.08.19
1/1-1/4	none
08.08.19
2/1	none
2/2	1
2/3	none
2/4	none
6wpf
22.01.20
1/1-1/3	none
2wpf
12.08.19
1/2		1
1/3	none
2/1		2
2/2		1
3/2		5
3/3		2
3wpf
13.08.19
1/1-1/4	none
2/1-2/2	none
3wpf
13.08.19
5/1		2
3wpf
13.08.19
3/2	none
6wpf
22.01.20
1/1-1/3	none
3wpf
09.11.19
1/1	none
3wpf
22.05.20
1/1	1	1
1/2		1
1/3	4
3wpf
25.05.20
1/1		3
1/2	none
1/3		1
2wpf
15.06.20
2/1	5		2
2/2	4	1
2/3	1
2/4	1		2
2/5	2	3	1
2/6	2	4	2
2/7		1
2wpf						max stage =	Sum of all sporopytes that reached the max stage for each slide
15.06.20						below max stage/arrested =	total fertilization events - max stage - aborted at zygote stage
1/1	2	3
1/2	none
1/3	2
1/4		1				total fertilization events/n	max stage	below max stage/arrested	aborted at zygote stage
Sum	33	43	20	2		98	16	49	33

## Sheet: Mpbell234 x wild type
Figure 5—source data 1c. Developmental staging data of crosses between Mpbell234-18 females and wild-type males
slide ID and week past fertilization	aborted	1wk	2wk	3wk	4wk
3wpf
21.04.20
1/1	2	2		1
1/2	3	5		2
1/3	3	3	1	1
1/4	none
1/5	1			3
1/6	2	1
3wpf
23.04.20
1/1	3	3		2
1/2	6	4		3
1/3	2	3		1
1/4	none
6wpf
19.02.20
1/1	1	10
1/2	1	10
1/3		4
6wpf
check date
1/2	none
1/3		1
1/4	none
2wpf
15.05.20
1/1	4	4	1
1/2	6	5	1
1/3	6	3	2
1/4	2	4	1
1/5	2	1	2
2wpf
15.04.20
2/1	3	3
2/2	1	2				max stage =	Sum of all sporopytes that reached the max stage for each slide
2/3	1	1				below max stage/arrested =	total fertilization events - max stage - aborted at zygote stage
3-4wpf
2.07.19
1/1					2
1/2	2	2	1		2	total fertilization events/n	max stage	below max stage/arrested	aborted at zygote stage
sum	51	71	9	13	4	148	24	73	51

## Sheet: Mpbell234 x Mpbell234
Figure 5—source data 1d. Developmental staging data of crosses between Mpbell234-18 females and Mpbell234-83 males
slide ID and week past fertilization	aborted	1wk	2wk	3wk	4wk
2wpf
23.04.20
1/1	none
1/2	none
2wpf
13.04.20
1/1	1
1/2	1
1/3		1
2wpf
22.04.20
1/1	none
1/2	none
3wpf
22.04.20
1/1	2	2
1/2	5
1/3	4	3				max stage =	Sum of all sporopytes that reached the max stage for each slide
3wpf						below max stage/arrested =	total fertilization events - max stage - aborted at zygote stage
22.04.20
2/1	none
2/2	none					total fertilization events/n	max stage	below max stage/arrested	aborted at zygote stage
sum	13	6				19	0	6	13

## Sheet: summary
Figure 5—source data 1e. Summary and calculations of developmental staging data
	Source data	max stage	below max stage/arrested	aborted at zygote stage	n	max stage	below max stage/arrested	aborted at zygote stage
wt female x wt male	Figure 5—source data 1a.	57	31	4	92	61.9565	33.6957	4.34783
wt female x bell234-83	Figure 5—source data 1b.	16	49	33	98	16.3265	50	33.6735
bell234-18 x wt male	Figure 5—source data 1c.	24	73	51	148	16.2162	49.3243	34.4595
bell234-18 x bell234-83	Figure 5—source data 1d.	0	6	13	19	0	31.5789	68.4211
knox1-6 x wt male	Figure 3—figure supplement 1—source data 1	0	3	126	129	0	2.32558	97.6744
Note: Mpknox1 crosses from Figure 3—figure supplement 1—source data 1 have been copied here to provide a comparision between Mpknox1 and Mpbell crosses.
