# Supplementary material for: Gamete expression of TALE class HD genes activates the diploid sporophyte program in Marchantia polymorpha
Source: eLife. 2021 Sep 17;10:e57088. doi: 10.7554/eLife.57088 (PMC8476127; doi:10.7554/eLife.57088)
Supplement: Supplementary file 1. — Table 1a. Primer name, gene number, sequence, and the corresponding figure used for sqRT-PCR and RACE. Table 1b. Primer name, gene name, and sequence used for in situ probe preparation. Table 1c. Primer name, gene name, and sequence used for overexpression, inducible overexpression, and transcriptional and translational β-glucuronidase reporter constructs. Table 1d. Guide RNA sequences used to generate mutant alleles. [file elife-57088-supp1.xlsx]

## Sheet: Table 1a
Table 1a. Primer name, gene number, sequence and corresponding Figure used for sqRT-PCR and RACE
Primer name	gene number	Sequence 5’-3’	Figure
MpKNOX1 F	Mp5g01600	ATGCTAGGCAGCAGTTCCTTC	1 S1
MpKNOX1 R		TCATCGTCTTGGGCCATTCAT	1 S1/5 S2
MpKNOX1 frag R		GGAGCTTGGAAAGAGATAAGTTG	5 S2
MpKNOX1A F	Mp4g12450	ATGCTGGACTTGGAAAATGAT	1 S1
MpKNOX1A R		TCAAACCTCACCTTCCAATGG	1 S1
MpKNOX1B F	Mp2g11140	ATGGAACAGGCCAGGGAACG	1 S1
MpKNOX1B R		TCAAGAGAACATAGTTTGAGC	1 S1
MpKNOX2 F	Mp7g05320	ATGTGTTTGGATGGATACCAA	1 S1
MpKNOX2 R		CTACTCTTGCATCACATCTG	1 S1
MpKNOX2 frag F		TATGGGGATCGTACTAGTCTCG	5 S2
MpKNOX2 frag R		TCCGTCTGGCAATTTGCCC	5 S2
MpBELL1 F	Mp8g18310	ATGCTCAAAGACTTTGGGCTC	1 S1/ 5 S2
MpBELL1 R		TCACTCCACAATGCCCTTTCC	1 S1
MpBELL1 RT R		CATCCGTCTCGTCATTTATATTCTCC	5 S2
MpBELL3 5’ F	Mp8g02970	CAGACCTCCGAAATCGGATCC	1 S1
MpBELL3 5’ R		CCGGTTCTGAATCAGAGCACC	1 S1
MpBELL3 3’ F		CAGCAATTGAAGCTGAAATTGG	5 S2
MpBELL3 3’ R		﻿TCACCTTTTCGTAATTCTCTCAATTGC	5 S2
TD 20		ATGGCAGGGAGGGGGGGTC	4 S2
TD 102		CAAGCGCAAGATGCTGTTGC	4 S2
TD 103		AACCCGTTCTCTGCGTGGAG	4 S2
TD 262		ATGCTGCACATGAAGATGGACG	4 S2
TD 343		TTATCGAATGAGCAATAACCTTTTCGTAATTC	4 S2
TD 344		CTGCGATGGGAGAGAGTTTCG	4 S2
TD 351		CTTTCTAGCAAATTAGCGTCTCTCATTATCCAC	4 S2
TD 352		GCTGCTACTCACTGCGATACG	4 S2
TD 353		CCTTTTCGTAATTCTCTCAATTGCTGCT	4 S2
TD 432		CCTTGTCGATAACCGGAAGACC	4 S2
TD 433		TGAATCGCAGGTCCTAAGCCCAGATC	4 S2
TD 434		TCCGGCTATCACTATGGGACAAATGG	4 S2
TD 435		GAGCATGTACAACTTCCTCACCC	4 S2
MpBELL4 F/ TD 27	Mp8g07680	GGAGAAGGAACGACTGGACG	1 S1/ 4 S3
MpBELL4 R/ TD 171		CTAGCCAGCAGCAAGGACATC	1 S1/ 4 S3
MpBELL4 F/ TD 325		GCGTCGCGCAGCAAATTCAACC	4 S3
MpBELL4 R/ TD 107		TGTACGCCGACCTCACTTTC	4 S3
TD 436		CGTATGAACAGGAGTACGCTTTG	4 S3
TD 437		TCTTTTATCGTAACAACACGCACGC	4 S3
TD 438		TAAGGTTTTGGAGACAACAATGCGTG	4 S3
TD 439		GCAGCAGGGGCTAAGAGGGAG	4 S3
TD 447		CCATTCTAGATCGGTCCAATTACAAGC	4 S3
TD 448		TGAAAGACTTTACGAGCAATCTGCC	4 S3
MpBELL5 F	Mp5g11060	GCAATTCCAAGCAAGTACTACC	1 S1
MpBELL5 R		TCAGGTCCTGATTTTCTCGG	1 S1
MpEF1α F	Mp3g23400	TTCAAGTACGCCTGGGTGCTCGAC	5 S2
MpEF1α R		TGCATCTCGACGGACTTAACCTC	5 S2
MpEF1α F		TTCACTCTGGGTGTGAAGCAG	1 S1/ 4 S2 S3
MpEF1α R		GCCTCGAGTAAAGCTTCGTG	1 S1/ 4 S2 S3

## Sheet: Table 1b
Table 1b. Primer name, gene name and sequence used for in situ probe preparation
Primer name	gene name	Sequence 5’-3’
MpBELL2 in situ F	Mp4g09650	ATGGATTATGAAGCTCGTCAC
MpBELL2 in situ R		CGTGACATTTCATAGACTTCTCG
shortMpBELL3 F	Mp8g02970	GCTGCTACTCACTGCGATACG
shortMpBELL3 R		CCTTTTCGTAATTCTCTCAATTGCTGCT
MpBELL4 cds F	Mp8g07680	caccATGTCGTCGAAGAAGCGAAAGG
MpBELL4 cds R		CTAGCCAGCAGCAAGGACATC
MpKNOX1 cds F	Mp5g01600	caccATGCTAGGCAGCAGTTCCTTC
MpKNOX1 cds R		TCATCGTCTTGGGCCATTCAT
MpSUK1 in situ F	Mp5g01590	caccGAAGCTTCACACTCAGTTTAGC
MpSUK1 in situ R		TGCTTGTTCGAAACTAACAGG

## Sheet: Table 1c
Table 1c. Primer name, gene name and sequence used for BiFC, overexpression, inducible overexpression, and transcriptional and translational β-glucuronidase reporter constructs
Primer name	gene name	Sequence 5’-3’
MpBELL1 BiFC N-term fusion F	Mp8g18310	TCTGGAGGAGGAGGCGCCATGCTCAAAGACTTTGGGCTCAG
MpBELL1 BiFC N-term fusion F		AGCAGGACTCTAGAGTCACTCCACAATGCCCTTTCCTTTTCT
proMpBELL2+gene KpnI F	Mp4g0965	taggtaccCTTAAATCATTGTAGGGCATTACG
proMpBELL2+gene KpnI R		taggtaccTGGAATATTCGAGGCTTTAGCTTTC
MpBELL3 cds F	Mp8g02970	TACAAAAAAGCAGGCTCCGCGGCCGCATGCTGCACATGAAGATGGACG
MpBELL3 cds R		GTACAAGAAAGCTGGGTCGGCGCGCCTCACCTTTTCGTAATTCTCTCAATTGCTGCT
proMpBELL3 F (pGWB104)		caccCAGAGAGAAAGTGTGAGAAGTAG
proMpBELL3 R (pGWB104)		TGAATCTGATTTCGGTTTTGTTGT
MpBELL3 BiFC N-term fusion 3' transcript F		GTGGATCTGGAGGAGGAGGCATGCTGATAGATGTCGATGACAACG
MpBELL3 BiFC N-term fusion 3' transcript R		ATTAAAGCAGGACTCTAGAGTTATCGAATGAGCAATAACCTTTTCGTAATTCTCTCAA
proMpBELL4 F (pGWB104)	Mp8g07680	caccCAGTGCTAGGAATGTCGCACAAC
proMpBELL4 R (pGWB104)		CCTGGATCTGATGTCGCTTGTG
internal_proMpBELL4 F (pGWB401)		TAAAACGACGGCCAGTGCCAGAAATGTACGACACCGCCTGC
internal_proMpBELL4 R (pGWB401)		GTACAAACTTGTTGATAACTCCTGGTTGTCGATATTGGCCAC
MpBELL4 BiFC N-term fusion F		TCTGGAGGAGGAGGCGCCATGTCGTCGAAGAAGCGAAAG
MpBELL4 BiFC N-term fusion R		AGCAGGACTCTAGAGCTAGCCAGCAGCAAGGACATC
MpKNOX1 cds F	Mp5g01600	TACAAAAAAGCAGGCTCCGCGGCCGCATGCTAGGCAGCAGTTCCT
MpKNOX1 cds R		GTACAAGAAAGCTGGGTCGGCGCGCCTCATCGTCTTGGGCCATTCATCTTG
proMpKNOX1 F (pGWB104)		caccACTCCGCCTATCGATGTTATTCC
proMpKNOX1 R (pGWB104)		TTCCAGGAAACCGTGACAAATG
proMpKNOX1 F (pGWB401)		TAAAACGACGGCCAGTGCCAACTCCGCCTATCGATGTTATTCCG
proMpKNOX1 R (pGWB401)		GTACAAACTTGTTGATAACTTTCCAGGAAACCGTGACAAATGC
MpKNOX1 BiFC N-term fusion F		TCTGGAGGAGGAGGCGCCATGCTAGGCAGCAGTTCCTTC
MpKNOX1 BiFC N-term fusion R		AGCAGGACTCTAGAGTCATCGTCTTGGGCCATTCAT
proMpSUK1 + gene F SacI (pGWB401)	Mp5g01590	TGATAACAGCGCTTAGAGCTACTGCGGTCCACGCT
proMpSUK1 + gene R SacI (pGWB401)		CGATCGGGGAAATTCGAGCTGACTTGGGTGTACTATTTATCTATTTGAGAGAA
proMpSUK1 + gene F AscI (pGWB401)		TCACATTAGGCTGAATTAGGACTGCGGTCCACGCT
proMpSUK1 + gene R AscI (pGWB401)		GTGTTGAATTCAGAAATAGGGACTTGGGTGTACTATTTATCTATTTGAGAGAAAATCA
proMpKNOX1A +gene SalI F	Mp4g12450	tagtcgacAACAGTGCAGATCCTTGATACG
proMpKNOX1A +gene KpnI R		taggtaccAACCTCACCTTCCAATGGTAGTTC
proMpKNOX1B +gene inf KpnI F	Mp2g11140	GTCTCGAGGAATTCGGTACCGCTATTTCCTAGTAATTCCATCCG
proMpKNOX1B +gene inf KpnI R		GATTTCGAACCCGGGGTACCAGAGAACATAGTTTGAGCCTCC
MpKNOX2 BiFC N-term fusion F	Mp7g05320	TCTGGAGGAGGAGGCGCCATGTGTTTGGATGGATACCAA
MpKNOX2 BiFC N-term fusion R		AGCAGGACTCTAGAGCTACTCTTGCATCACATCTG

## Sheet: Table 1d
Table 1d. Guide RNA sequences used to generate mutant alleles.
Name	gRNA1 5'-3'	gRNA2 5'-3'
Mpknox1-6ge	GAACACAGCTGATGGTAAACAGG	GAAAGTGATTCGGTCAGTGGTGG
Mpbell2-1ge	GAAGCTCGTCACTCACAAGAGG
Mpbell2-2ge	GAAGCTCGTCACTCACAAGAGG
Mpbell2-11ge	GAAGCTCGTCACTCACAAGAGG
Mpbell3-4ge	AGACGAGTGGGGGCCACTTGTGG	TTCCCCCAGGCTGAACAGTACGG
Mpbell3-10ge	AGACGAGTGGGGGCCACTTGTGG	TTCCCCCAGGCTGAACAGTACGG
Mpbell4-5ge	TGAACCCAAGGAGGCTGTCGTGG	GTAATCGGAGGAACAACAATGGG
Mpbell4-24ge	TGAACCCAAGGAGGCTGTCGTGG	GTAATCGGAGGAACAACAATGGG
Mpbell34-4ge (Mpbell3-1ge Mpbell4-1ge)
MpBELL2	GAAGCTCGTCACTCACAAGAGG
Mpbell3-1ge	AGACGAGTGGGGGCCACTTGTGG	TTCCCCCAGGCTGAACAGTACGG
Mpbell4-1ge	TGAACCCAAGGAGGCTGTCGTGG
Mpbell234-15ge (Mpbell2-15ge Mpbell3-15ge Mpbell4-15ge)
Mpbell2-15ge	GAAGCTCGTCACTCACAAGAGG
Mpbell3-15ge	AGACGAGTGGGGGCCACTTGTGG	TTCCCCCAGGCTGAACAGTACGG
Mpbell4-15ge	TGAACCCAAGGAGGCTGTCGTGG
Mpbell234-83ge (Mpbell2-83ge Mpbell3-83ge Mpbell4-83ge)
Mpbell2-83ge	GCTCCTCCGACCAATTGGCATGG	GAAGATTTAGCAAAGGAATCTGG
Mpbell3-83ge	AGACGAGTGGGGGCCACTTGTGG	TTCCCCCAGGCTGAACAGTACGG
Mpbell4-83ge	TGAACCCAAGGAGGCTGTCGTGG	GTAATCGGAGGAACAACAATGGG
Mpbell234-7ge (Mpbell2-7ge Mpbell3-7ge Mpbell4-7ge)
Mpbell2-7ge	GAAGCTCGTCACTCACAAGAGG
Mpbell3-7ge	AGACGAGTGGGGGCCACTTGTGG	TTCCCCCAGGCTGAACAGTACGG
Mpbell4-7ge	TGAACCCAAGGAGGCTGTCGTGG
Mpbell234-18ge (Mpbell2-18ge Mpbell3-18ge Mpbell4-18ge)
Mpbell2-18ge	GAAGCTCGTCACTCACAAGAGG
Mpbell3-18ge	AGACGAGTGGGGGCCACTTGTGG	TTCCCCCAGGCTGAACAGTACGG
Mpbell4-18ge	TGAACCCAAGGAGGCTGTCGTGG
proEF1:XVE>>amiR-MpE(z)1SkmiR166	GUGGGGCUGGA⌃CAUGUGGCUC
